# Supplementary material
Source: PubMed Central journal article supplement (PMC2844117)
Supplement: NIHMS180002-supplement-supplement_1.pdf [file NIHMS180002-supplement-supplement_1.pdf]

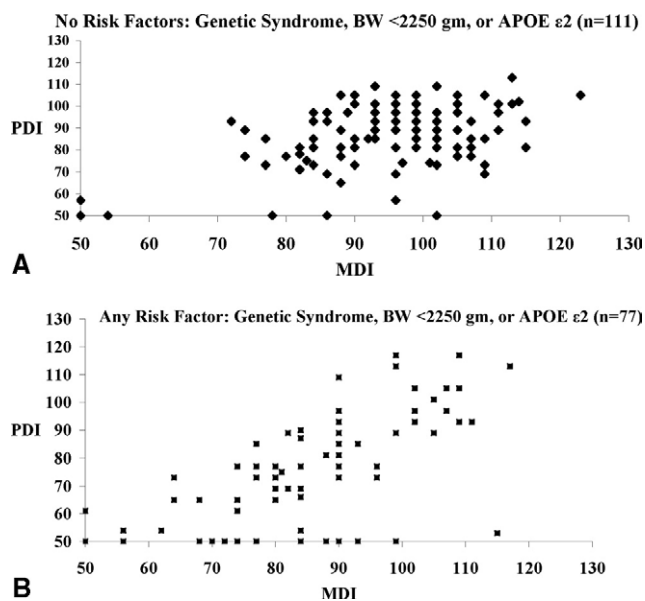

**Figure E1.** A, X-Y plot showing MDI and PDI scores for 111 patients with no risk factors (low birth weight, genetic syndrome, or *APOE*  $\epsilon$ 2 allele). The *x-axis* is the MDI score and the *y-axis* is the PDI score. B, X-Y plot showing MDI and PDI scores for 77 patients with one or more risk factors (low birth weight, genetic syndrome, or *APOE*  $\epsilon$ 2 allele). The *x-axis* is the MDI score and the *y-axis* is the PDI score. The number of patient with low scores on both measures is increased compared with patients with no risk factors (A). *BW*, Birth weight; *APOE*, apolipoprotein E; *MDI*, Mental Developmental Index; *PDI*, Psychomotor Developmental Index.

**TABLE E1. Preoperative and intraoperative characteristics of the patients who returned and of those who did not return**

| Variable                          | Patients evaluated at 1 year |     |          |       | Patients who did not return |    |          |       | Stat   | P    |
|-----------------------------------|------------------------------|-----|----------|-------|-----------------------------|----|----------|-------|--------|------|
|                                   | Sample                       | n   | Mean (%) | SD    | Sample                      | n  | Mean (%) | SD    |        |      |
| Gender                            | 188                          |     |          |       | 55                          |    |          |       | 2.229  | .135 |
| Female                            |                              | 85  | 45.2%    |       |                             | 18 | 32.7%    |       |        |      |
| Male                              |                              | 103 | 54.8%    |       |                             | 37 | 67.3%    |       |        |      |
| Ethnicity                         | 188                          |     |          |       | 55                          |    |          |       | 2.364  | .669 |
| White                             |                              | 136 | 72.3%    |       |                             | 35 | 63.6%    |       |        |      |
| Asian/Pacific Islander            |                              | 4   | 2.1%     |       |                             | 1  | 1.8%     |       |        |      |
| Black                             |                              | 23  | 12.2%    |       |                             | 11 | 20.0%    |       |        |      |
| Hispanic                          |                              | 6   | 3.2%     |       |                             | 2  | 3.6%     |       |        |      |
| American Indian                   |                              | 0   | 0.0%     |       |                             | 0  | 0.0%     |       |        |      |
| Other                             |                              | 19  | 10.1%    |       |                             | 6  | 10.9%    |       |        |      |
| APOE genotype                     | 188                          |     |          |       | 55                          |    |          |       | 2.168  | .826 |
| APOE $\epsilon$ 22/ $\epsilon$ 23 |                              | 22  | 11.7%    |       |                             | 9  | 16.4%    |       |        |      |
| APOE $\epsilon$ 33                |                              | 117 | 62.2%    |       |                             | 33 | 60.0%    |       |        |      |
| APOE $\epsilon$ 33/ $\epsilon$ 44 |                              | 42  | 22.3%    |       |                             | 10 | 18.2%    |       |        |      |
| APOE $\epsilon$ 24                |                              | 5   | 2.7%     |       |                             | 1  | 1.8%     |       |        |      |
| Unknown                           |                              | 2   | 1.1%     |       |                             | 2  | 3.6%     |       |        |      |
| Diagnosis                         | 188                          |     |          |       | 55                          |    |          |       | 6.417  | .093 |
| TGA/IVS                           |                              | 39  | 20.7%    |       |                             | 5  | 9.1%     |       |        |      |
| VSD                               |                              | 34  | 18.1%    |       |                             | 15 | 27.3%    |       |        |      |
| TOF                               |                              | 56  | 29.8%    |       |                             | 21 | 38.2%    |       |        |      |
| Other                             |                              | 59  | 31.4%    |       |                             | 14 | 25.5%    |       |        |      |
| Birth history                     |                              |     |          |       |                             |    |          |       |        |      |
| Type of delivery                  | 186                          |     |          |       | 48                          |    |          |       |        |      |
| Cesarean section                  |                              | 129 | 69.4%    |       |                             | 31 | 64.6%    |       | 0.211  | .646 |
| Vaginal                           |                              | 57  | 30.6%    |       |                             | 17 | 35.4%    |       |        |      |
| Multiple gestation                | 187                          |     |          |       | 47                          |    |          |       |        |      |
| Yes                               |                              | 10  | 5.3%     |       |                             | 0  | 0.0%     |       | 74.397 | .000 |
| No                                |                              | 177 | 94.7%    |       |                             | 47 | 100%     |       |        |      |
| Gestational age (wk)              | 188                          |     | 38.40    | 2.44  | 49                          |    | 38.63    | 2.27  | -0.632 | .529 |
| APGAR 1 min                       | 184                          |     | 7.72     | 1.65  | 46                          |    | 7.93     | 1.36  | -0.906 | .368 |
| APGAR 5 min                       | 184                          |     | 8.63     | 0.94  | 46                          |    | 8.76     | 0.71  | -1.043 | .300 |
| Birth weight (g)                  | 187                          |     | 3107     | 667   | 50                          |    | 3128     | 630   | -0.213 | .832 |
| Birth length (cm)                 | 182                          |     | 49.41    | 3.73  | 46                          |    | 49.03    | 3.39  | 0.676  | .501 |
| Birth head circumference (cm)     | 183                          |     | 33.47    | 2.18  | 46                          |    | 33.04    | 2.26  | 1.161  | .250 |
| Preoperative variables            |                              |     |          |       |                             |    |          |       |        |      |
| Intubation                        | 186                          |     |          |       | 48                          |    |          |       |        |      |
| Yes                               |                              | 45  | 24.2%    |       |                             | 10 | 20.8%    |       | 0.089  | .765 |
| No                                |                              | 141 | 75.8%    |       |                             | 38 | 79.2%    |       |        |      |
| Prostaglandin infusion            | 186                          |     |          |       | 48                          |    |          |       |        |      |
| Yes                               |                              | 51  | 27.4%    |       |                             | 9  | 18.8%    |       | 1.084  | .298 |
| No                                |                              | 135 | 72.4%    |       |                             | 39 | 81.2%    |       |        |      |
| Preoperative LOS (d)              | 188                          |     | 2.15     | 4.92  | 55                          |    | 1.49     | 2.09  | 1.454  | .147 |
| Operative variables               |                              |     |          |       |                             |    |          |       |        |      |
| Age at operation (d)              | 188                          |     | 61.34    | 54.59 | 55                          |    | 80.33    | 61.02 | -2.078 | .041 |
| Weight at operation (kg)          | 188                          |     | 4.26     | 1.35  | 55                          |    | 4.39     | 1.30  | -0.641 | .523 |
| Total support time (min)          | 188                          |     | 86.99    | 43.47 | 55                          |    | 73.85    | 28.07 | 2.660  | .009 |
| CPB duration (min)                | 188                          |     | 75.32    | 46.63 | 55                          |    | 63.58    | 29.61 | 2.239  | .027 |
| Use of DHCA                       | 188                          |     |          |       | 55                          |    |          |       | 0.546  | .460 |
| Yes                               |                              | 67  | 35.6%    |       |                             | 16 | 29.1%    |       |        |      |
| No                                |                              | 121 | 64.4%    |       |                             | 39 | 70.1%    |       |        |      |
| DHCA duration (min)               | 67                           |     | 32.7     | 14.8  | 16                          |    | 35.3     | 10.3  | -0.819 | .419 |
| Cooling time (min)                | 188                          |     | 12.40    | 6.09  | 55                          |    | 12.58    | 7.07  | -0.174 | .862 |
| Lowest NP temperature (°C)        | 188                          |     | 22.80    | 5.30  | 55                          |    | 23.93    | 5.02  | -1.442 | .153 |
| Hematocrit after hemodilution (%) | 188                          |     | 27.22    | 4.15  | 55                          |    | 27.53    | 3.98  | -0.502 | .617 |

TABLE E1. Continued

| Variable                | Patients evaluated at 1 year |     |          |       | Patients who did not return |    |          |      | Stat    | P    |
|-------------------------|------------------------------|-----|----------|-------|-----------------------------|----|----------|------|---------|------|
|                         | Sample                       | n   | Mean (%) | SD    | Sample                      | n  | Mean (%) | SD   |         |      |
| ECMO/VAD                | 188                          |     |          |       | 55                          |    |          |      |         |      |
| Yes                     |                              | 2   | 1.1%     |       |                             | 0  | 0.0%     |      | 104.292 | .000 |
| No                      |                              | 186 | 98.9%    |       |                             | 55 | 100%     |      |         |      |
| Delayed sternal closure | 188                          |     |          |       | 55                          |    |          |      | 70.719  | .000 |
| Yes                     |                              | 13  | 6.9%     |       |                             | 0  | 0.0%     |      |         |      |
| No                      |                              | 175 | 93.1%    |       |                             | 55 | 100%     |      |         |      |
| Postoperative variables |                              |     |          |       |                             |    |          |      |         |      |
| Total hospital LOS (d)  | 188                          |     | 10.91    | 13.02 | 55                          |    | 8.40     | 6.77 | 1.909   | .058 |
| Postoperative LOS (d)   | 188                          |     | 8.76     | 10.73 | 55                          |    | 6.91     | 5.56 | 1.708   | .089 |

*APOE*, Apolipoprotein E; *TGA/IVS*, transposition of the great arteries with intact ventricular septum; *VSD*, ventricular septal defect; *TOF*, tetralogy of Fallot; *LOS*, length of stay; *CPB*, cardiopulmonary bypass; *DHCA*, deep hypothermic circulatory arrest; *Total support time*, CPB time + DHCA time; *NP*, nasopharyngeal; *ECMO*, extracorporeal membrane oxygenation; *VAD*, ventricular assist device.
